# Supplementary material for: Structural and photophysical characterisation of coordination and optical isomers of mononuclear ruthenium(ii) polypyridyl 1,2,4-triazole complexesElectronic supplementary information (ESI) available: analytical and semipreparative HPLC chromatograms, CD and UV/vis spectra. See http://www.rsc.org/suppdata/dt/b3/b301961f/
Source: Royal Society of Chemistry journal article supplement (doi:10.1039/b301961f), 2003-01-01

# Supplementary information


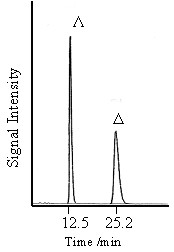
Figure S1. Analytical HPLC Chromatogram of the  and  stereoisomers of **1**

Figure S2. Analytical HPLC Chromatogram of the  and  stereoisomers of **3**

Figure S3. Semipreparative HPLC Chromatogram of the  and  stereoisomers of **3**


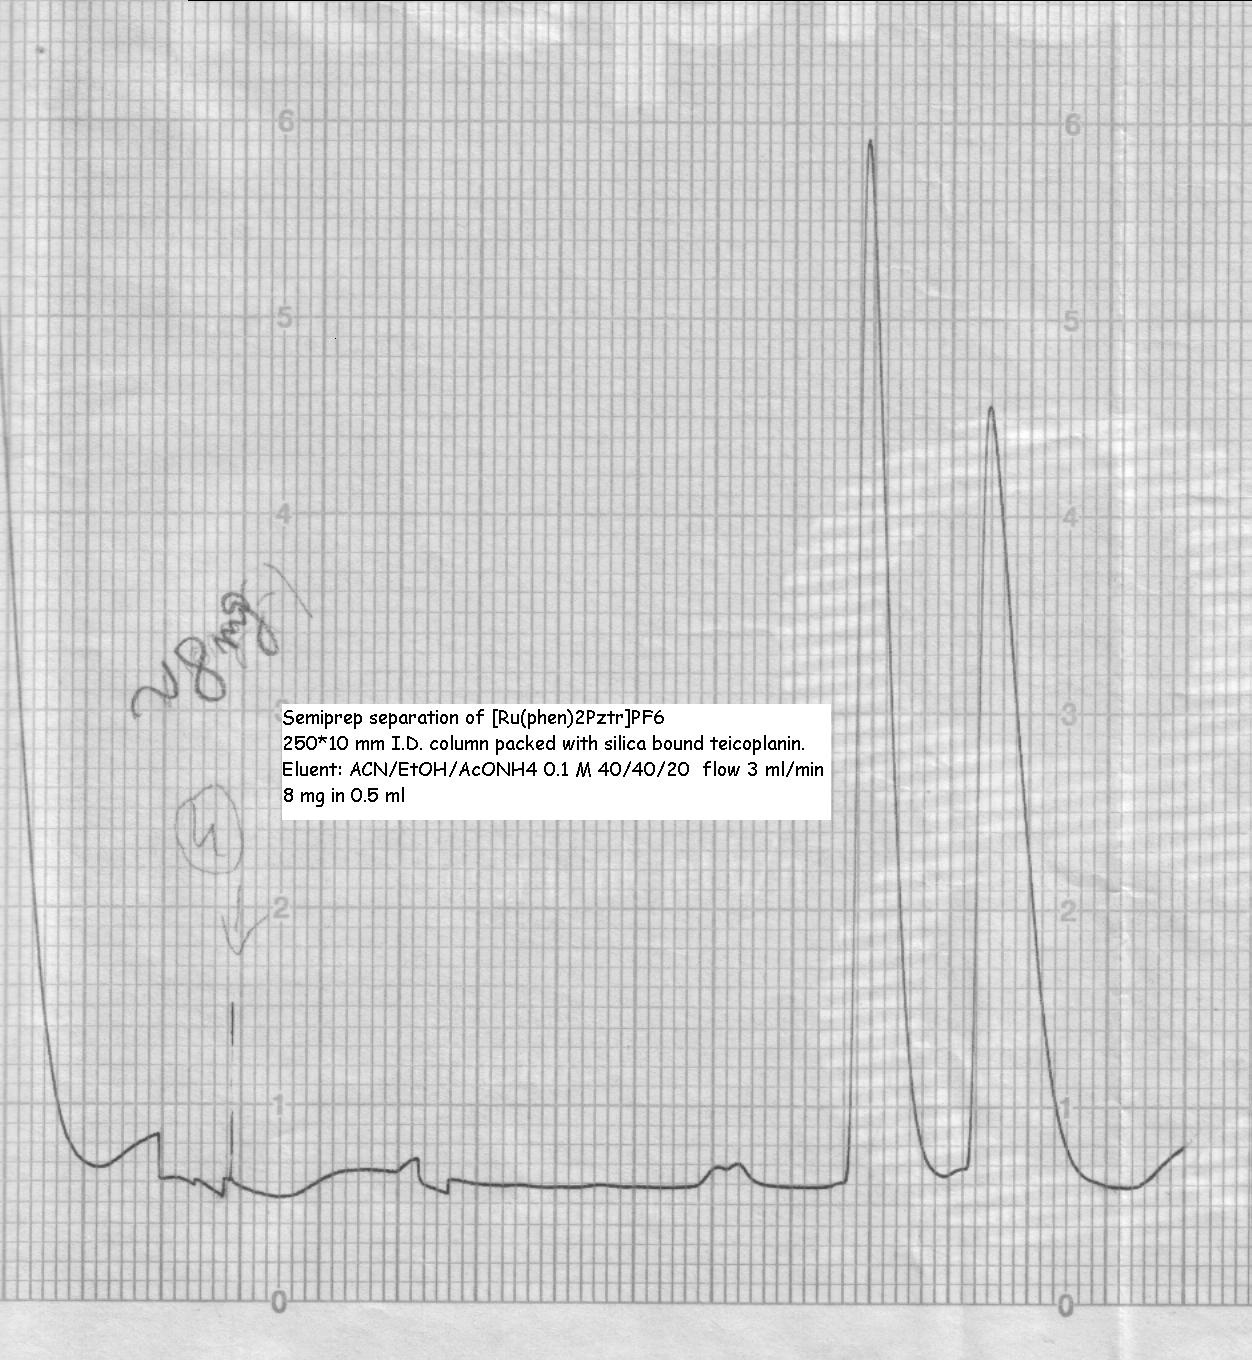


Figure S4. CD and UV.Vis spectra of the  and  stereoisomers of **1.** *{P1 is the isomer/1a and P2 is the  isomer/1b).*


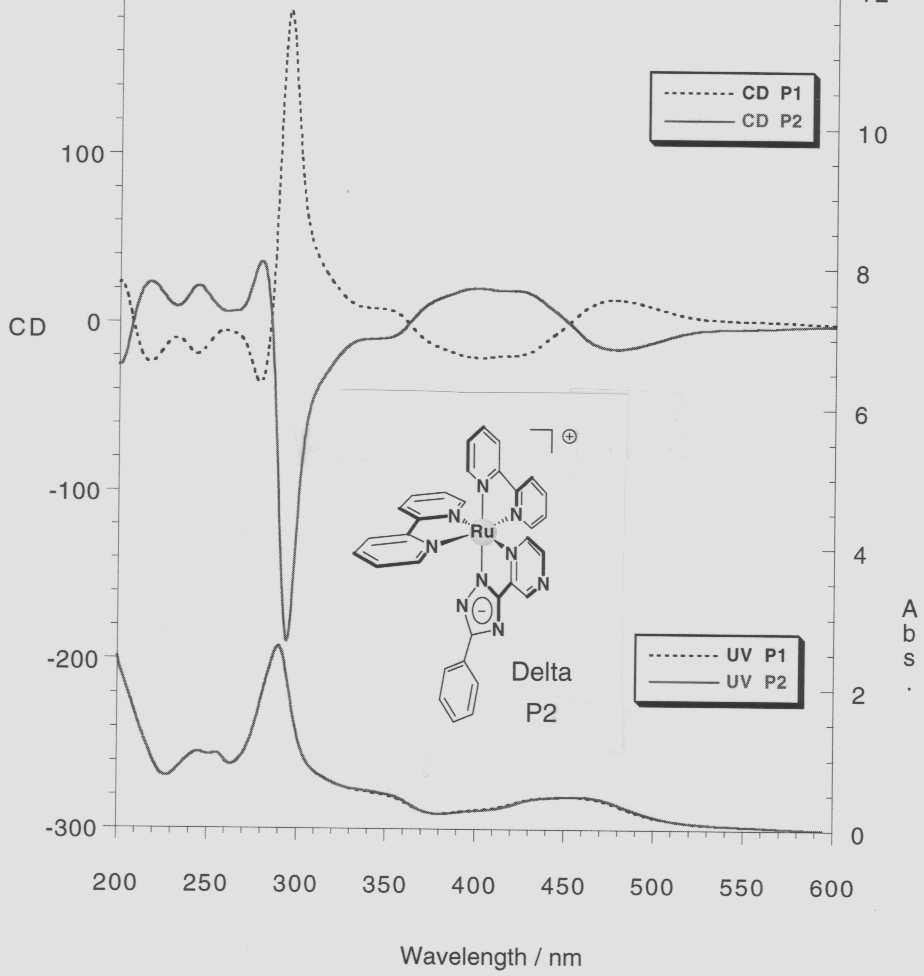

Supplement: b301961f.doc [file b301961f.doc]
